# Supplementary material for: Overexpression of a New Chitinase Gene EuCHIT2 Enhances Resistance to Erysiphe cichoracearum DC. in Tobacco Plants
Source: PubMed Central journal article supplement (PMC5713330; doi:10.3390/ijms18112361), 2017-11-07
Supplement: ijms-18-02361-s001.pdf [file ijms-18-02361-s001.pdf]

```

CGAAAA ATG AGG TTT ACC TTG TCC ACT CTC CTC CCT CTC TTC CCT TTC TTT CTC GCC GCC < 60
      M R F T L S T L L P L F P F F L A A
GTC ACG GCG GAG CAA TGC GGA AGG CAA GCT GGC GGC GCA TCC TGT CCT TCC GGA CTC TGC < 120
V T A E Q C G R Q A G G A S C P S G L C
TGC AGC AAC TTC GGG TGG TGC GGC AAT ACC CCA GAA TAC TGT GGC TCC GGT AAC TGC CAG < 180
C S N F G W C G N T P E Y C G S G N C Q
AGC CAG TGC GGC CAA CCC CAG CCG GCT CCC ACC CCC GGC GGA GAC ATC ACT AGT CTC ATT < 240
S Q C G Q P Q P A P T P G G D I T S L I
ACT CGT GAC ACG TTC AAC AAC ATG CTC CGG CAC AGT AAC GAC GCC GCT TGC CCC GCC CGG < 300
T R D T F N N M L R H S N D A A C P A R
AAC TTC TAC ACC TAC GAC GCT TTC ATA TCC GCC GCC AGA TCT TTC GCC GGA TTC GCG ACT < 360
N F Y T Y D A F I S A A R S F A G F A T
ACC GGC GAC TCC AGC GTA CCG GGA AGG GAA CTC GCC GCT TTC TTC GCT CAG ACC TCC CAT < 420
T G D S S V R G R E L A A F F A Q T S H
GAG ACT ACT GGT GGA TGG GCT ACT GCA CCT GAT GGA CCA TAT GCT TGG GGA TAT TGT TTT < 480
E T T G G W A T A P D G P Y A W G Y C F
CTG AGG GAG CAA GGA AAT CCG GGC GAC TAT TGC CAG CCA AGT GCT CAA TGG CCG TGC GCT < 540
L R E Q G N F G D Y C Q P S A Q W P C A
TCC GGC AGA CAA TAC TAC GGC CGC GGT CCC ATG CAA ATT TCC TTC AAC TAC AAC TAC GGG < 600
S G R Q Y Y G R G P M Q I S F N Y N Y G
CCT TGC GGG CGA GCG ATC GGG GCG GAC CTA CTG AAC AAT CCA GAC CTA GTA ATC ACC GAC < 660
P C G R A I G A D L L N N P D L V I T D
CCG ATC ATT TCC TTT AGG ACG GCG ATC TGG TTC TGG ATG ACT CCG CAA TCG CCA AAG CCG < 720
P I I S F R T A I W F W M T P Q S P K P
TCC TGC CAT GAC GTG ATC ACC GGA AGA TGG TCT CCG TCC GGC GCC GAT ACG GCG GCC GGC < 780
S C H D V I T G R W S P S G A D T A A G
AGA CTT CCT GGG TTT GGG ACC GTG ACA AAC ATC ATC AAC GGC GGA CTC GAA TGC GGG CAT < 840
R L P F G F G T V T N I I N G G L E C G H
GGA TCC GAT CCG AGG GTC CAG GAT CGA ATC GGG TTT TAC CCG AGG TAT TGT GAC ATA TTG < 900
G S D P R V Q D R I G F Y R R Y C D I L
GGC GTT GGA TAT GGT GAT AAC TTG GAT TGC GGG AAT CAA AGG CCT TTT GGT AAT GGG CTT < 960
G V G Y G D N L D C G N Q R P F G N G L
TTA GTT CAG GCC CAG TAG < 978
L V Q A Q *
TCCCATCATGGTGGTGCITTAAGCTAGTTAATGTTTTTGTGTTGAATAAGGTGTACTCTTCCTTGTAGTGAAATGTAATGAAC
TAGTTCATTACATCATAANTGAGGTAAGGTAATAAATAACTTTGTGGGTGAAAATGAATTTTGATTGTTCCCTAATCTAAC
GGTTGTTTGTAGTGTCTCTAGGTGTTTGTGCTTCTAGTGGGAGATATAGTATTCAAAAATTCATCCCGAAAAAAA
AAAAAAAAAAAAAAAAAAAA < 1218

```

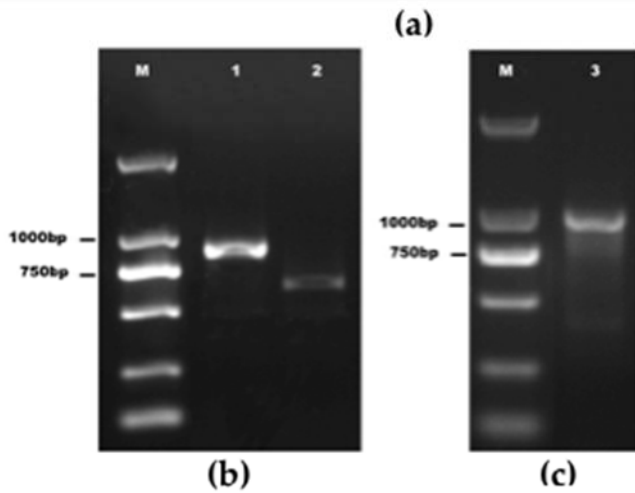

**Supplementary Figure S1.** RACE-PCR amplification and sequence analysis of *EuCHIT2*. (a) The nucleotide and deduced amino acid sequences of *EuCHIT2*. *EuCHIT2* (KJ413009.1) consists of 1218 bp with a 972-bp open reading frame encoding a protein with 324 amino acid residues. Start codon (ATG) is underlined; stop codon (TAG) is indicated by \*. The amino acid residues critical for the chitinase catalytic activity are in bold font. The conserved AATAAA hexamer of the poly (A) signal is highlighted in grey. The overlapping RACE sequences are highlighted in yellow. (b) and (c) Electrophoresis of RACE-PCR products (b) Lane 1, *EuCHIT2*-3' RACE (927 bp); lane 2, *EuCHIT2*-5' RACE (567 bp); (c) lane 3, open reading frame of *EuCHIT2*; lane M, DL 2000 DNA marker. and

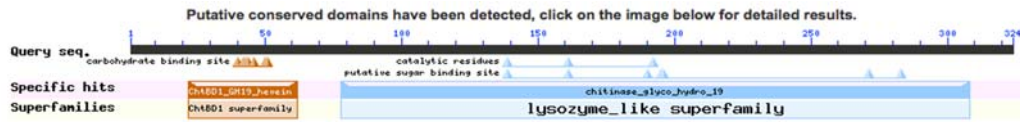

**Supplementary Figure S2** Conserved domains of the deduced EuCHIT2 protein obtained using NCBI's Conserved Domain Database.

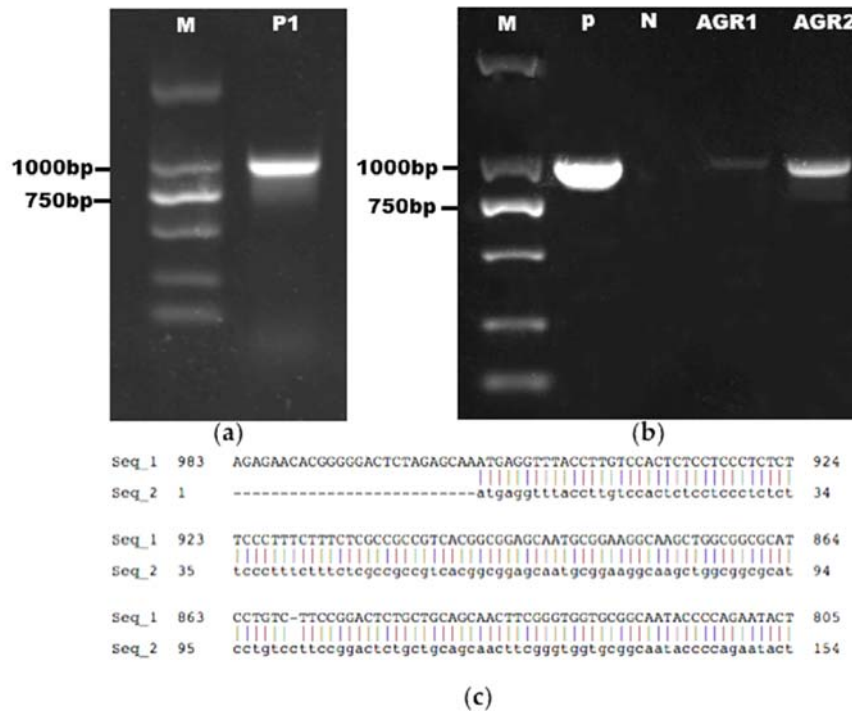

**Supplementary Figure S3.** Vector construction verification. A 996 bp fragment of full open reading frame was amplified with *EuCHIT2-XbaI-F* and *EuCHIT2-EcoRI-R* *EuCHIT2* primer. (a) Electrophoresis of PCR product amplified from plasmid vector pSH-35s-*EuCHIT2*. Full length of protein-coding region of *EuCHIT2* (996 bp) was shown in the gel image. Lane M, DL2000 DNA marker; lane P1, PCR amplification of plasmid vector pSH-35s-*EuCHIT2*. (b) Electrophoresis of PCR amplification for kanamycin-resistant *Agrobacterium* strains. A 996 bp lane was shown in the gel image. Lane M, DL 2000 DNA marker, lane P, positive control; lane N, negative control; lanes AGR1 and AGR2, kanamycin-resistance positive clones. (c) Sequences of the PCR amplification.

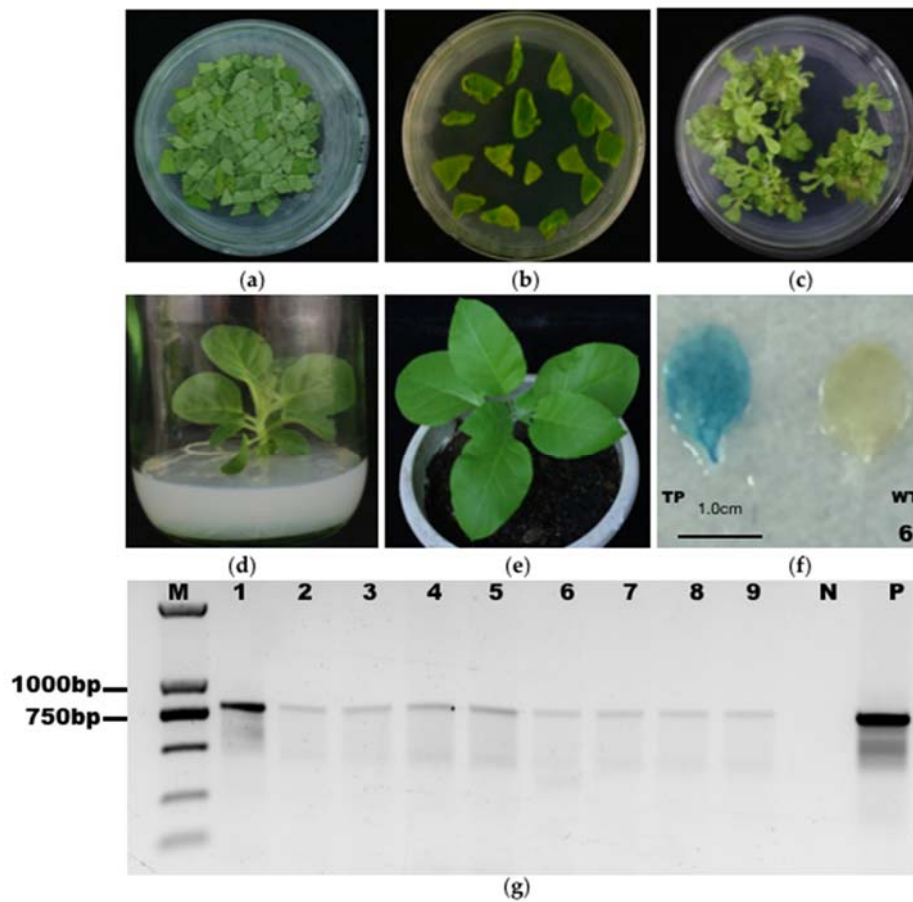

**Supplementary Figure S4.** Transformation and verification of transgenic tobacco plants. Tobacco was transformed with *A. tumefaciens* LBA4404 containing the overexpression vector pSH-35s-*EuCHIT2*, and co-cultured for 48 h. Transgenic tobacco plants generated with the *EuCHIT2* overexpression vector were identified by Gus staining and PCR amplification by primers pSH-35s-F and T*EuCHIT2*-R to produce a 778 bp fragment that contained part of the 35S promoter fragment and part of the *EuCHIT2* sequence (448 + 330 bp) (a–e) The transformation process in tobacco leaves. (f) Histochemical staining of the transgenic tobacco (TP) and wild type tobacco (WT) leaves. (g) Electrophoresis of PCR products. Lane M, DL2000 DNA marker; lanes 1–9, PCR amplification for Gus positives transgenic tobacco lines; lane N, wild type tobacco; lane P, plasmid pSH-35S-*EuCHIT2*.
